# Supplementary material for: Genome-wide identification, genomic organization, and expression profiling of the CONSTANS-like (COL) gene family in petunia under multiple stresses
Source: Research Square preprint supplement (doi:10.21203/rs.3.rs-307371/v1), 2021-03-24
Supplement: Supplementary file 3 [file e852086f806aedaf22520e95.xlsx]

## Sheet: Sheet1
Table S5	PaCOL genes information
Species	TF ID	Given Name	Description	Closest Arabidopsis	Arabidopsis Domain
Petunia axillaris	Peaxi162Scf00007g01220	PeaxiCOL 01	CO-like family protein	AT3G21880.1	Arabidopsis thaliana B-box type zinc finger protein with CCT domain
	Peaxi162Scf00012g03214	PeaxiCOL 02	CO-like family protein	AT3G21880.1	Arabidopsis thaliana B-box type zinc finger protein with CCT domain
	Peaxi162Scf00015g00927	PeaxiCOL 03	CO-like family protein	AT1G25440.1	Arabidopsis thaliana B-box type zinc finger protein with CCT domain
	Peaxi162Scf00020g01929	PeaxiCOL 04	CO-like family protein	AT3G02380.1	Arabidopsis thaliana CONSTANS-like 2
	Peaxi162Scf00045g01824	PeaxiCOL 05	CO-like family protein	AT5G24930.1	Arabidopsis thaliana CONSTANS-like 4
	Peaxi162Scf00047g02226	PeaxiCOL 06	CO-like family protein	AT3G07650.2	Arabidopsis thaliana CONSTANS-like 9
	Peaxi162Scf00067g01119	PeaxiCOL 07	CO-like family protein	AT2G47890.1	Arabidopsis thaliana B-box type zinc finger protein with CCT domain
	Peaxi162Scf00128g01749	PeaxiCOL 08	CO-like family protein	AT2G33500.1	Arabidopsis thaliana B-box type zinc finger protein with CCT domain
	Peaxi162Scf00359g00213	PeaxiCOL 09	CO-like family protein	AT5G48250.1	Arabidopsis thaliana B-box type zinc finger protein with CCT domain
	Peaxi162Scf00382g00067	PeaxiCOL 10	CO-like family protein	AT1G25440.1	Arabidopsis thaliana B-box type zinc finger protein with CCT domain
	Peaxi162Scf00416g00214	PeaxiCOL 11	CO-like family protein	AT3G21880.1	Arabidopsis thaliana B-box type zinc finger protein with CCT domain
	Peaxi162Scf00459g00510	PeaxiCOL 12	CO-like family protein	AT5G24930.1	Arabidopsis thaliana CONSTANS-like 4
	Peaxi162Scf00581g00039	PeaxiCOL 13	CO-like family protein	AT5G48250.1	Arabidopsis thaliana B-box type zinc finger protein with CCT domain
	Peaxi162Scf00942g00122	PeaxiCOL 14	CO-like family protein	AT5G57660.1	Arabidopsis thaliana CONSTANS-like 5
	Peaxi162Scf01346g00018	PeaxiCOL 15	CO-like family protein	AT1G25440.1	Arabidopsis thaliana B-box type zinc finger protein with CCT domain
